# Supplementary material for: Cross-Sectional Associations of Self-Reported Social/Emotional Support and Life Satisfaction with Smoking and Vaping Status in Adults
Source: MDPI journal article supplement (doi:10.3390/ijerph191710722), 2022-08-28
Supplement: s1 [file s1]

**Table S1.** The estimated adjusted odds ratios of smoking and vaping status for covariates.

|                |                                  | Dual users           | Ex-smokers           | Exclusive smokers    | Current vapers who were ex-smokers | Exclusive vapers        |
|----------------|----------------------------------|----------------------|----------------------|----------------------|------------------------------------|-------------------------|
| Variables      | Levels                           | (n=806)              | (n=13,376)           | (n=6,121)            | (n=454)                            | (n=208)                 |
| Age            |                                  |                      |                      |                      |                                    |                         |
|                | 18-34                            | 4.900 (2.750, 8.731) | 0.328 (0.275, 0.390) | 1.339 (1.065, 1.685) | 2.605 (1.518, 4.470)               | 65.812 (8.604, 503.421) |
|                | 35-64                            | 2.772 (1.704, 4.510) | 0.591 (0.530, 0.658) | 1.405 (1.182, 1.669) | 2.126 (1.430, 3.161)               | 8.125 (1.142, 57.783)   |
|                | 65+                              | Reference            | Reference            | Reference            | Reference                          | Reference               |
| Gender         |                                  |                      |                      |                      |                                    |                         |
|                | Male                             | 1.856 (1.409, 2.444) | 1.751 (1.614, 1.898) | 1.557 (1.389, 1.745) | 1.920 (1.397, 2.638)               | 2.075 (1.105, 3.894)    |
|                | Female                           | Reference            | Reference            | Reference            | Reference                          | Reference               |
| Marital Status |                                  |                      |                      |                      |                                    |                         |
|                | Married                          | 0.376 (0.220, 0.643) | 0.621 (0.473, 0.816) | 0.418 (0.318, 0.549) | 0.395 (0.195, 0.799)               | 0.259 (0.079, 0.846)    |
|                | Divorced                         | 0.667 (0.333, 1.337) | 0.780 (0.584, 1.043) | 1.113 (0.827, 1.499) | 0.507 (0.235, 1.094)               | 0.810 (0.219, 2.994)    |
|                | Widowed                          | 0.447 (0.213, 0.937) | 0.695 (0.518, 0.932) | 0.699 (0.502, 0.972) | 0.143 (0.053, 0.390)               | 2.233 (0.385, 12.951)   |
|                | Separated                        | 0.694 (0.314, 1.531) | 0.678 (0.423, 1.088) | 1.053 (0.663, 1.671) | 0.279 (0.064, 1.217)               | <0.001                  |
|                | Never Married                    | 0.525 (0.306, 0.898) | 0.364 (0.272, 0.486) | 0.619 (0.470, 0.816) | 0.304 (0.144, 0.641)               | 1.102 (0.437, 2.782)    |
|                | A member of an unmarried couple  | Reference            | Reference            | Reference            | Reference                          | Reference               |
| Employment     |                                  |                      |                      |                      |                                    |                         |
|                | Employed for wages               | 0.437 (0.288, 0.665) | 0.741 (0.609, 0.902) | 0.573 (0.461, 0.713) | 1.038 (0.558, 1.930)               | 0.722 (0.141, 3.701)    |
|                | Self-employed                    | 0.430 (0.236, 0.783) | 0.759 (0.603, 0.955) | 0.554 (0.420, 0.730) | 0.622 (0.278, 1.392)               | 0.302 (0.047, 1.926)    |
|                | Out of work for 1 year or more   | 0.805 (0.409, 1.584) | 0.901 (0.646, 1.257) | 0.949 (0.647, 1.393) | 0.702 (0.258, 1.911)               | 0.959 (0.104, 8.881)    |
|                | Out of work for less than 1 year | 0.396 (0.187, 0.839) | 0.759 (0.516, 1.117) | 0.835 (0.582, 1.198) | 1.558 (0.517, 4.695)               | 0.313 (0.048, 2.064)    |
|                | A homemaker                      | 0.633 (0.291, 1.377) | 0.722 (0.553, 0.944) | 0.766 (0.557, 1.052) | 1.024 (0.379, 2.770)               | 0.784 (0.056, 10.930)   |
|                | A student                        | 0.199 (0.082, 0.484) | 0.319 (0.200, 0.510) | 0.148 (0.090, 0.245) | 0.495 (0.173, 1.416)               | 1.441 (0.267, 7.774)    |
|                | Retired                          | 0.378 (0.210, 0.681) | 0.837 (0.683, 1.024) | 0.533 (0.419, 0.679) | 0.694 (0.377, 1.280)               | 0.938 (0.113, 7.759)    |
|                | Unable to work                   | Reference            | Reference            | Reference            | Reference                          | Reference               |
| General Health |                                  |                      |                      |                      |                                    |                         |
|                | Excellent                        | 0.265 (0.138, 0.511) | 0.550 (0.428, 0.706) | 0.329 (0.246, 0.440) | 0.163 (0.070, 0.377)               | 1.431 (0.257, 7.967)    |
|                | Very good                        | 0.283 (0.163, 0.491) | 0.636 (0.502, 0.807) | 0.485 (0.374, 0.630) | 0.377 (0.174, 0.816)               | 1.409 (0.263, 7.534)    |

| Variables     | Levels | Dual users           | Ex-smokers           | Exclusive smokers    | Current vapers who<br>were ex-smokers | Exclusive vapers     |
|---------------|--------|----------------------|----------------------|----------------------|---------------------------------------|----------------------|
|               |        | (n=806)              | (n=13,376)           | (n=6,121)            | (n=454)                               | (n=208)              |
|               | Good   | 0.592 (0.357, 0.980) | 0.762 (0.602, 0.963) | 0.704 (0.548, 0.905) | 0.435 (0.203, 0.933)                  | 0.919 (0.169, 4.989) |
|               | Fair   | 0.454 (0.330, 0.899) | 0.866 (0.678, 1.107) | 0.956 (0.737, 1.239) | 0.769 (0.355, 1.666)                  | 1.487 (0.272, 8.134) |
|               | Poor   | Reference            | Reference            | Reference            | Reference                             | Reference            |
| Mental Health |        | 1.034 (1.021, 1.047) | 1.010 (1.003, 1.017) | 1.028 (1.021, 1.035) | 1.020 (1.000, 1.040)                  | 1.020 (0.992, 1.049) |

**Table S2.** Number of adult participants in each smoking/vaping category and age group.

| <b>Smoking/vaping status</b>              | <b>Age: 18-34 (n = 7,459)</b> | <b>Age: 35-64 (n = 24,141)</b> | <b>Age: 65+ (n = 15,563)</b> |
|-------------------------------------------|-------------------------------|--------------------------------|------------------------------|
| <b>Dual users</b>                         | 245                           | 460                            | 101                          |
| <b>Ex-smokers</b>                         | 908                           | 6,203                          | 6,265                        |
| <b>Never users</b>                        | 4,895                         | 13,433                         | 7,870                        |
| <b>Exclusive smokers</b>                  | 1,103                         | 3,755                          | 1,263                        |
| <b>Current vapers who were ex-smokers</b> | 126                           | 266                            | 62                           |
| <b>Exclusive vapers</b>                   | 182                           | 24                             | 2                            |
